# Supplementary material for: Continuous hydrogenation of ethyl levulinate to γ-valerolactone and 2-methyl tetrahydrofuran over alumina doped Cu/SiO2 catalyst: the potential of commercialization
Source: PubMed Central journal article supplement (PMC4932554; doi:10.1038/srep28898), 2016-07-05
Supplement: srep28898-s1.pdf [file srep28898-s1.pdf]

Supporting information for

**Continuous hydrogenation of ethyl levulinate to  $\gamma$ -valerolactone and 2-methyl tetrahydrofuran over alumina doped Cu/SiO<sub>2</sub> catalyst: the potential of commercialization**

Junlin Zheng<sup>2†</sup>, Junhua Zhu<sup>1,2†</sup>, Xuan Xu<sup>2</sup>, Wanmin Wang<sup>2</sup>, Jiwen Li<sup>2</sup>, Yan Zhao<sup>2</sup>, Kangjian Tang<sup>1,2</sup>, Qi Song<sup>2</sup>, Xiaolan Qi<sup>2</sup>, Dejin Kong<sup>2</sup>, Yi Tang<sup>1</sup>

1 Department of Chemistry, Fudan University, Shanghai, 200233, China

2 Shanghai Research Institute of Petrochemical Technology SINOPEC, Shanghai 201208, China.

† co-first author with equal contribution

XRD patterns of H<sub>2</sub> reduced Cu/SiO<sub>2</sub> and Cu/Al<sub>2</sub>O<sub>3</sub>-SiO<sub>2</sub> catalysts were collected (as shown in Figure 1S), and the Cu particle sizes were calculated by scherrer equation, respectively. After H<sub>2</sub> reduction, the copper particle sizes of Cu/SiO<sub>2</sub> and Cu/Al<sub>2</sub>O<sub>3</sub>-SiO<sub>2</sub> are 22.40 nm and 19.10 nm, respectively.

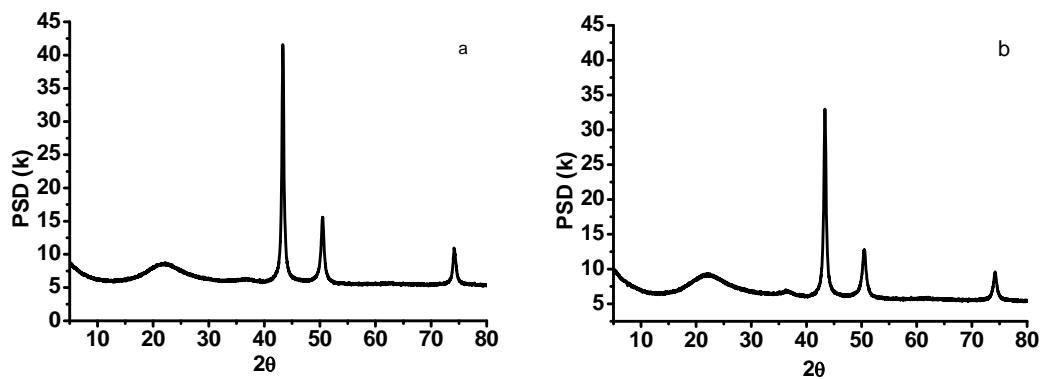

Figure S1. XRD patterns of H<sub>2</sub> reduced Cu/SiO<sub>2</sub> (a) and Cu/Al<sub>2</sub>O<sub>3</sub>-SiO<sub>2</sub> (b) catalysts.

Figure S2 displays the Py-IR spectroscopy of the Cu/SiO<sub>2</sub> (a) and Cu/Al<sub>2</sub>O<sub>3</sub>-SiO<sub>2</sub> (b) catalysts desorbed at 200 °C, 250 °C, 300 °C, and 350 °C stepwise. Normally, the peak at 1450 cm<sup>-1</sup> and 1540 cm<sup>-1</sup> are ascribed to Lewis acidic sites and Brønsted acidic sites, respectively. The Cu/SiO<sub>2</sub> catalyst only has very weak Lewis acidic sites, as indicated by the desorption signal at 200 °C and 250 °C. Whereas, the Cu/Al<sub>2</sub>O<sub>3</sub>-SiO<sub>2</sub> catalyst possesses stronger Lewis acidic sites, as indicated by the stronger desorption signals at 200 °C and 250 °C, as well as the additional desorption signals at 300 °C.

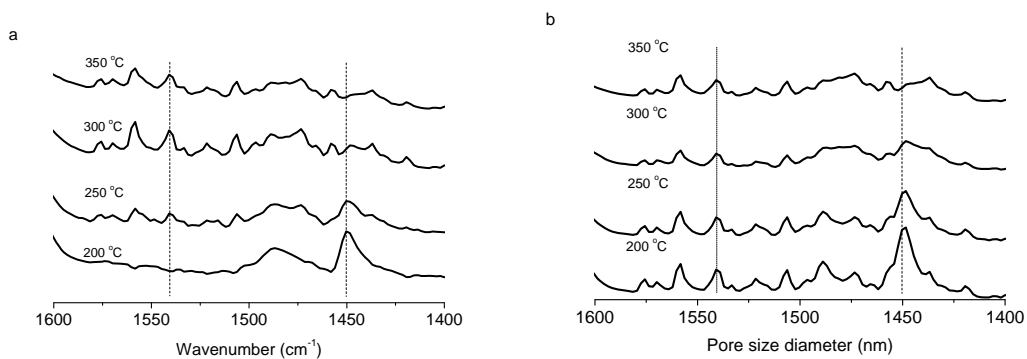

**Figure S2. Py-IR characterization of CuO/SiO<sub>2</sub> (a) and CuO/Al<sub>2</sub>O<sub>3</sub>-SiO<sub>2</sub> (b) catalysts.**

Figure S3a shows the TEM micrograph of spent Cu/Al<sub>2</sub>O<sub>3</sub>-SiO<sub>2</sub> catalyst after 1000 h test. The copper particles are not clearly displayed. The spent catalyst was re-calcined at 500 °C for 2 h in the air, and the morphology of CuO particles in TEM micrograph is manifested in Figure S3b. The CuO particles distribute around 20-60 nm. Sintering of Cu particles was not remarkable during long-term operation, which also accounted for the good stability of this Cu/Al<sub>2</sub>O<sub>3</sub>-SiO<sub>2</sub> catalyst.

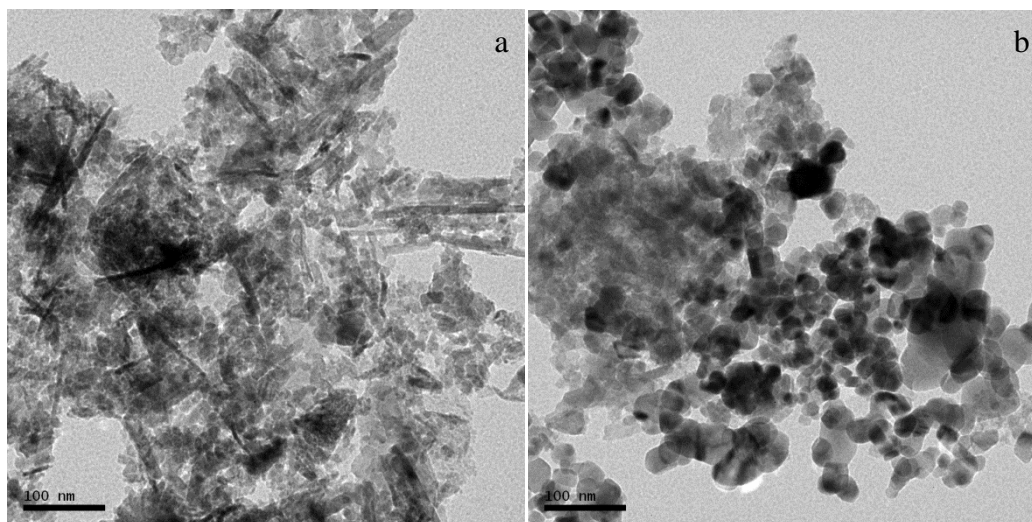

Figure S3. TEM micrographs of spent Cu/Al<sub>2</sub>O<sub>3</sub>-SiO<sub>2</sub> catalyst: (a) after 1000 h test; (b) re-calcined at 500 °C for 2 h in air.
